# Supplementary material for: Comparative Gene Signature of (−)-Oleocanthal Formulation Treatments in Heterogeneous Triple Negative Breast Tumor Models: Oncological Therapeutic Target Insights
Source: MDPI journal article supplement (doi:10.3390/nu13051706), 2021-05-18
Supplement: s1 [file s1]

## Article

# Comparative Gene Signature of (–)-Oleocanthal Formulation Treatments in Heterogeneous Triple Negative Breast Tumor Models: Oncological Therapeutic Target Insights

Mohammed H. Qusa, Khaldoun S. Abdelwahed, Abu Bakar Siddique, Khalid A. El Sayed \*

School of Basic Pharmaceutical and Toxicological Sciences, College of Pharmacy, University of Louisiana at Monroe, 1800 Bienville Drive, Monroe, LA 71201, USA; qusamh@warhawks.ulm.edu (M.H.Q); abdelwks@warhawks.ulm.edu (K.S.A); siddiqab@warhawks.ulm.edu (A.B.S.)

\* Correspondence: elsayed@ulm.edu; Tel.: +1-318-342-1725

## Supplementary Materials:

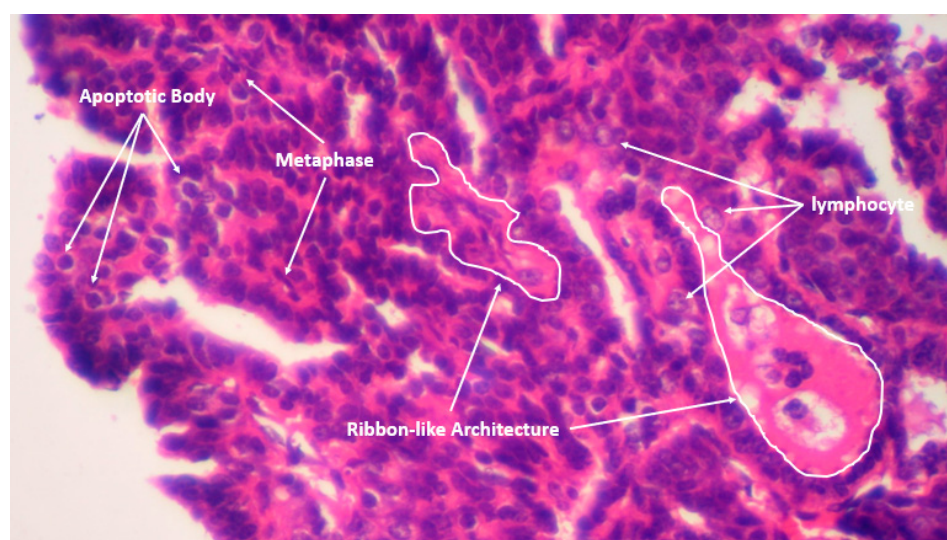

**Citation:** Qusa, M.H.; Abdelwahed, K.S.; Siddique, A.B.; El Sayed, K.A. Comparative Gene Signature of (–)-Oleocanthal Formulation Treatments in Heterogeneous Triple Negative Breast Tumor Models: Oncological Therapeutic Target Insights. *Nutrients* **2021**, *13*, 1706. <https://doi.org/10.3390/nu13051706>

Received: date  
Accepted: date  
Published: date

**Publisher's Note:** MDPI stays neutral with regard to jurisdictional claims in published maps and institutional affiliations.

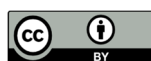

**Copyright:** © 2021 by the authors. Submitted for possible open access publication under the terms and conditions of the Creative Commons Attribution (CC BY) license (<http://creativecommons.org/licenses/by/4.0/>).

**Supplementary Figure S1:** Expansion of the H&E stained tumor micromorphology changes in MMTV-PyVT control tumor.

A

MMTV 1.5(2--2) fold - 2019-12-11 02:29 PM

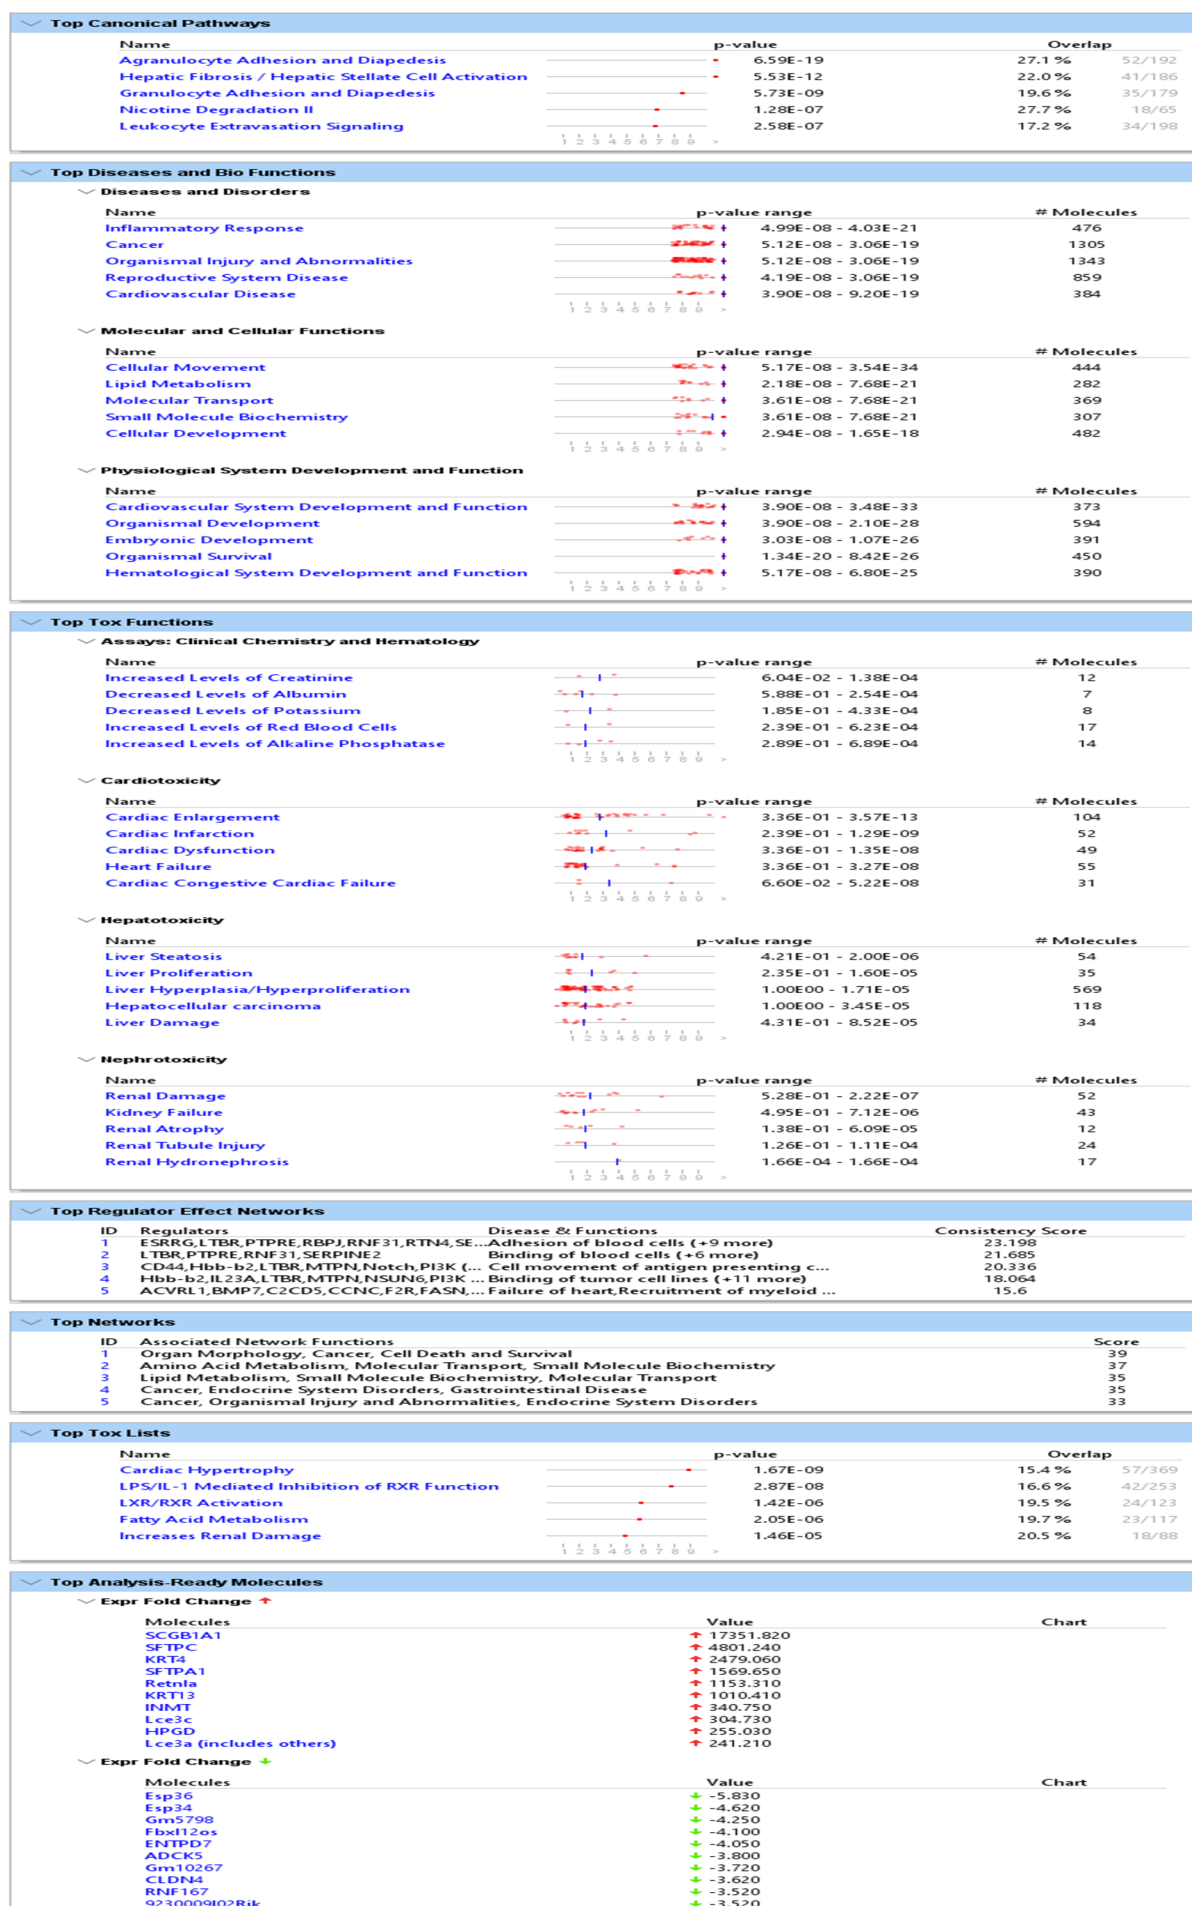

B

PDX 1.5 fold(2--2) - 2019-12-11 02:11 PM

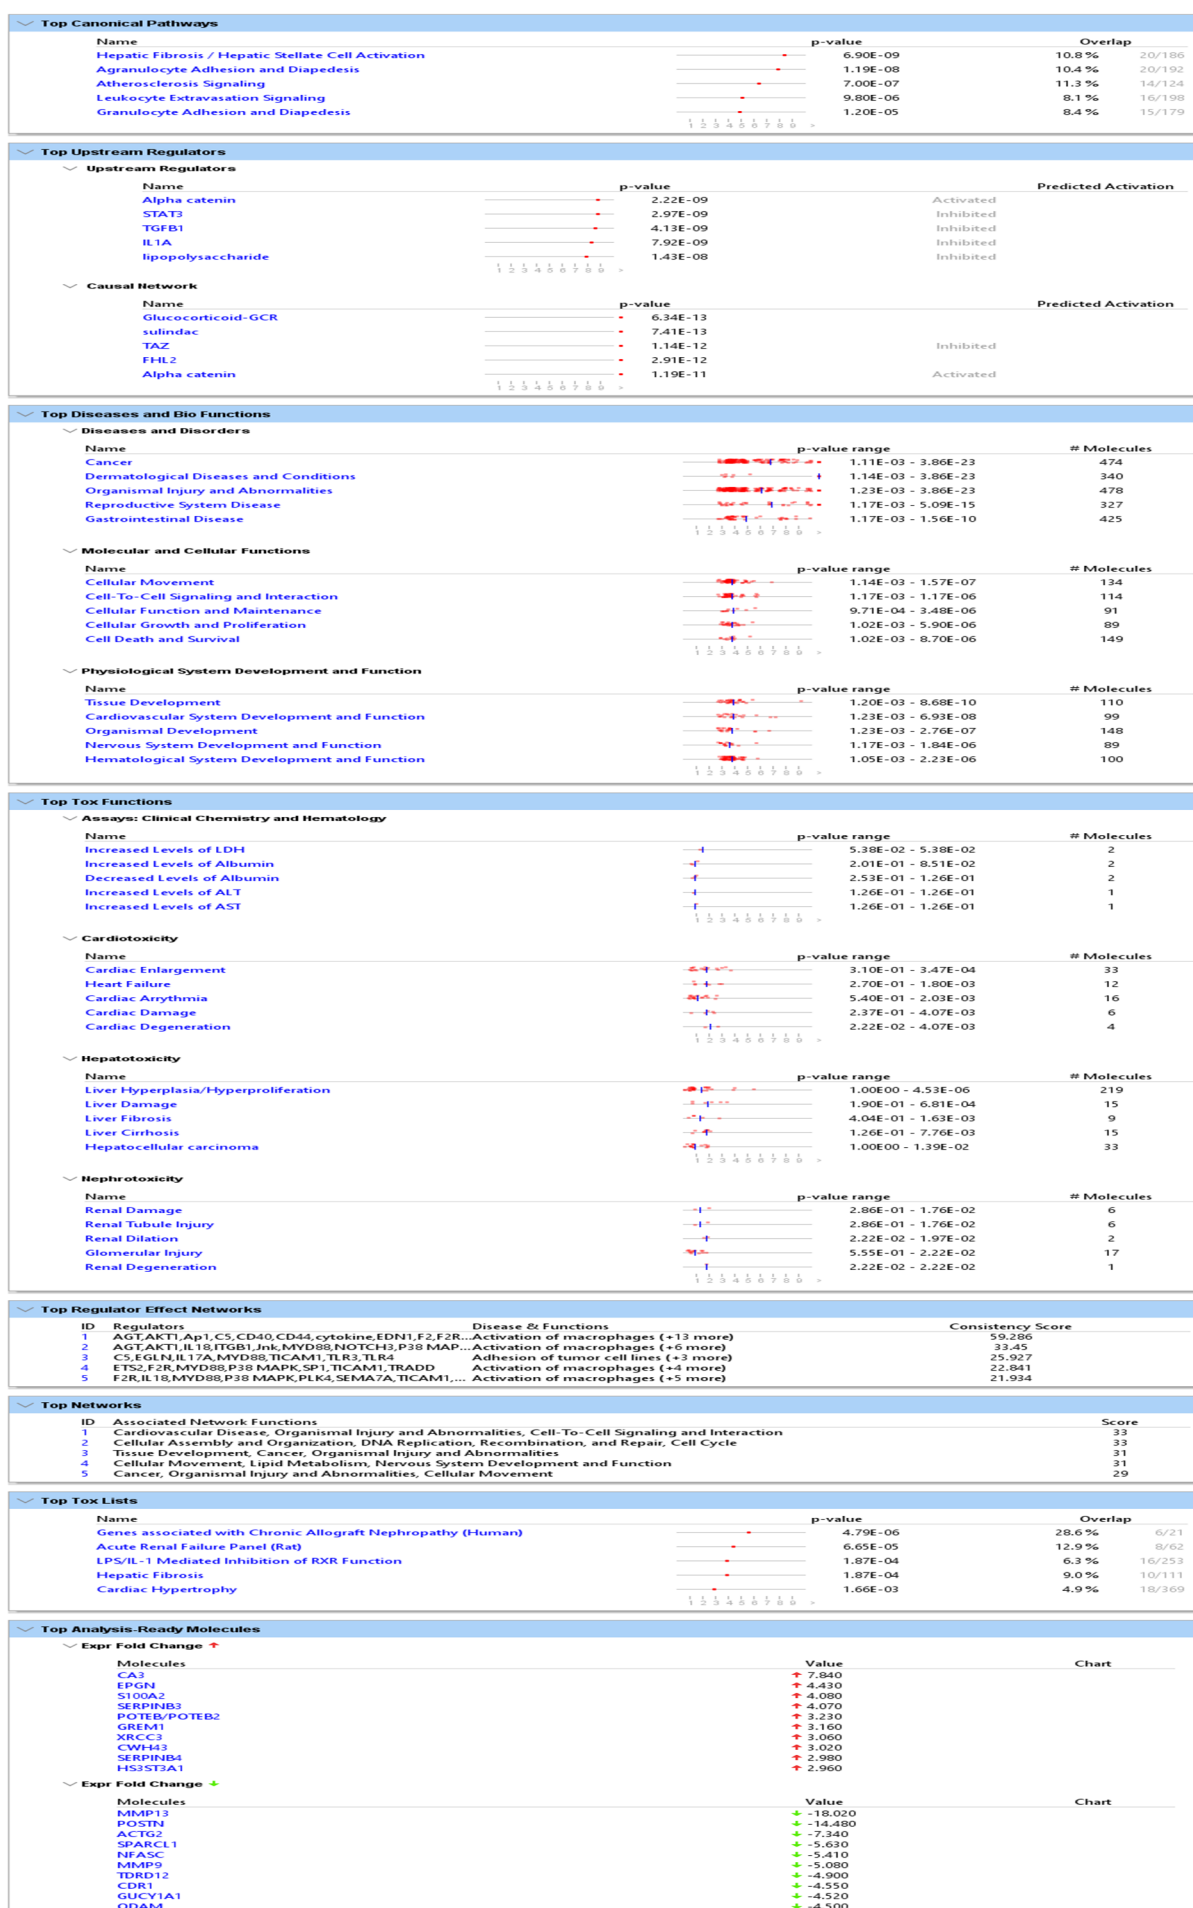

**Supplementary Figure S2:** Ingenuity Pathway Analysis (IPA)-derived summary reports for MMTV-PyVT transgenic (A) and PDX mouse tumors (B) microarray data.

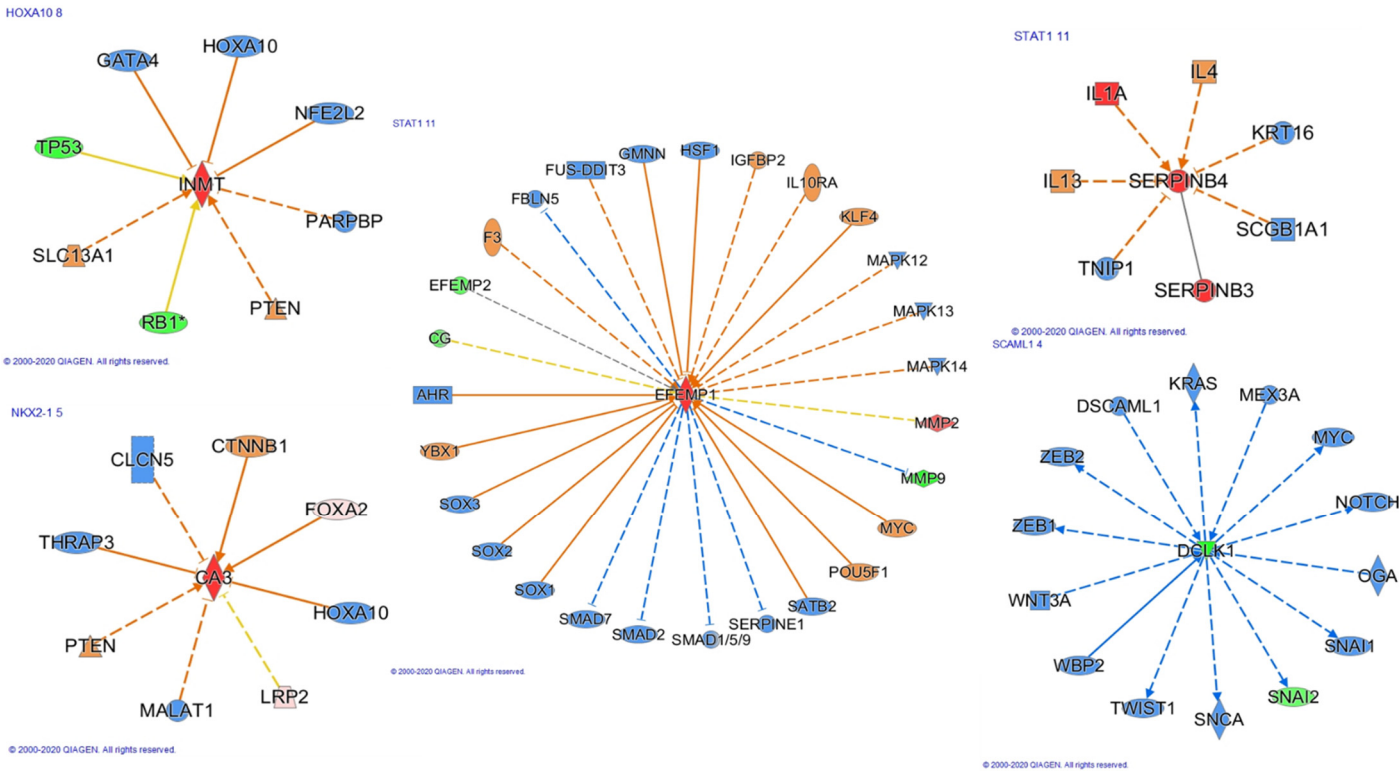

**Supplementary Figure S3:** IPA-Predicted mapping of the top affected genes by OC-X treatments overlapped in MMTV-PyVT and PDX mice tumor datasets.

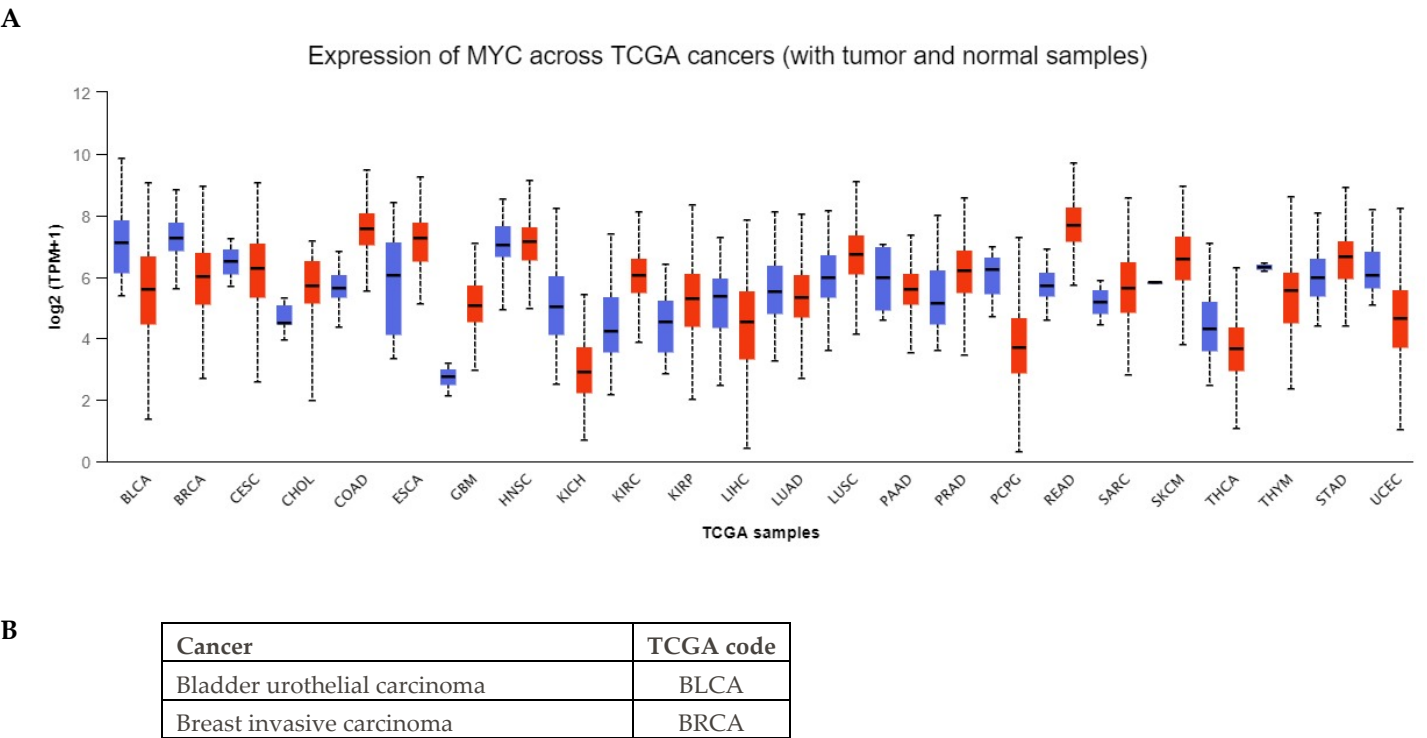

|                                       |      |
|---------------------------------------|------|
| Cervical squamous cell carcinoma      | CESC |
| Cholangiocarcinoma                    | CHOL |
| Colon adenocarcinoma                  | COAD |
| Esophageal carcinoma                  | ESCA |
| Glioblastoma multiforme               | GBM  |
| Head and neck squamous cell carcinoma | HNSC |
| Kidney chromophobe                    | KICH |
| Kidney renal clear cell carcinoma     | KIRC |
| Kidney renal papillary cell carcinoma | KIRP |
| Liver hepatocellular carcinoma        | LIHC |
| Lung adenocarcinoma                   | LUAD |
| Lung squamous cell carcinoma          | LUSC |
| Pancreatic adenocarcinoma             | PAAD |
| Prostate adenocarcinoma               | PRAD |
| Pheochromocytoma and paraganglioma    | PCPG |
| Rectum adenocarcinoma                 | READ |
| Sarcoma                               | SARC |
| Skin cutaneous melanoma               | SKCM |
| Thyroid carcinoma                     | THCA |
| Thymoma                               | THYM |
| Stomach adenocarcinoma                | STAD |
| Uterine corpus endometrial carcinoma  | UCEC |

**Supplementary Figure S4:** Expression of MYC in different human samples. **(A)** The UALCAN for Cancer Genomics database analysis (<http://ualcan.path.uab.edu/cgi-bin/Pan-cancer.pl?genenam=MYC>) indicates the predominance of the expression of the mRNAs for MYC within the tumor and normal samples across The Cancer Genome Atlas (TCGA) database. **(B)** Key legend for the TCGA tumor samples.
